# Supplementary material for: Spatially distributed water-balance and meteorological data from the Wolverton catchment, Sequoia National Park, California
Source: Copernicus journal article supplement (doi:10.5194/essd-2018-70), 2018-06-13
Supplement: Supplementary file [file essd-2018-70-RC1-supplement.pdf]

Please comment on the inter-site differences in climate between Wolverton and Panther met stations. In some cases the differences in climate appear to be larger than can be easily explained by differences in elevation and microclimate.

These data indicate that temperatures at Wolverton can be 8 to 12 degrees warmer than at Panther. This difference cannot be explained by the dry adiabatic lapse rate which would predict a max difference of about 5.6 deg C. Could there be any site specific issues with the Wolverton station? Are there structures or parking lots that could cause excess warming?

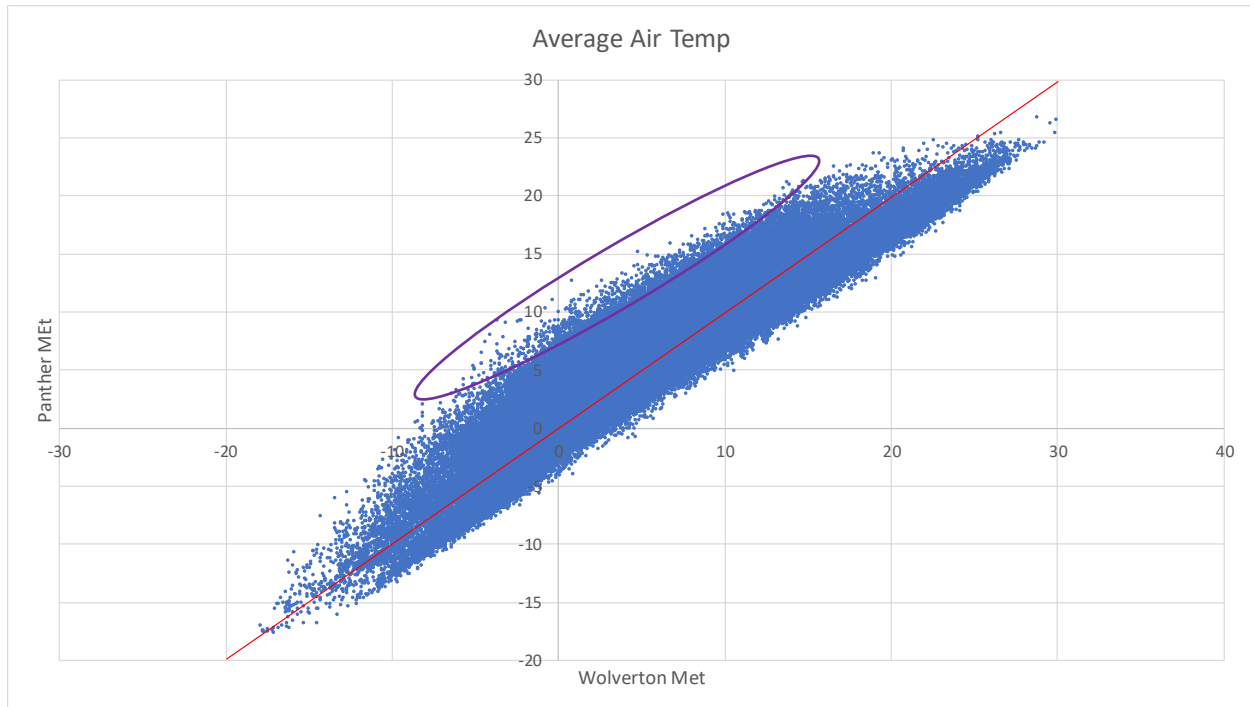

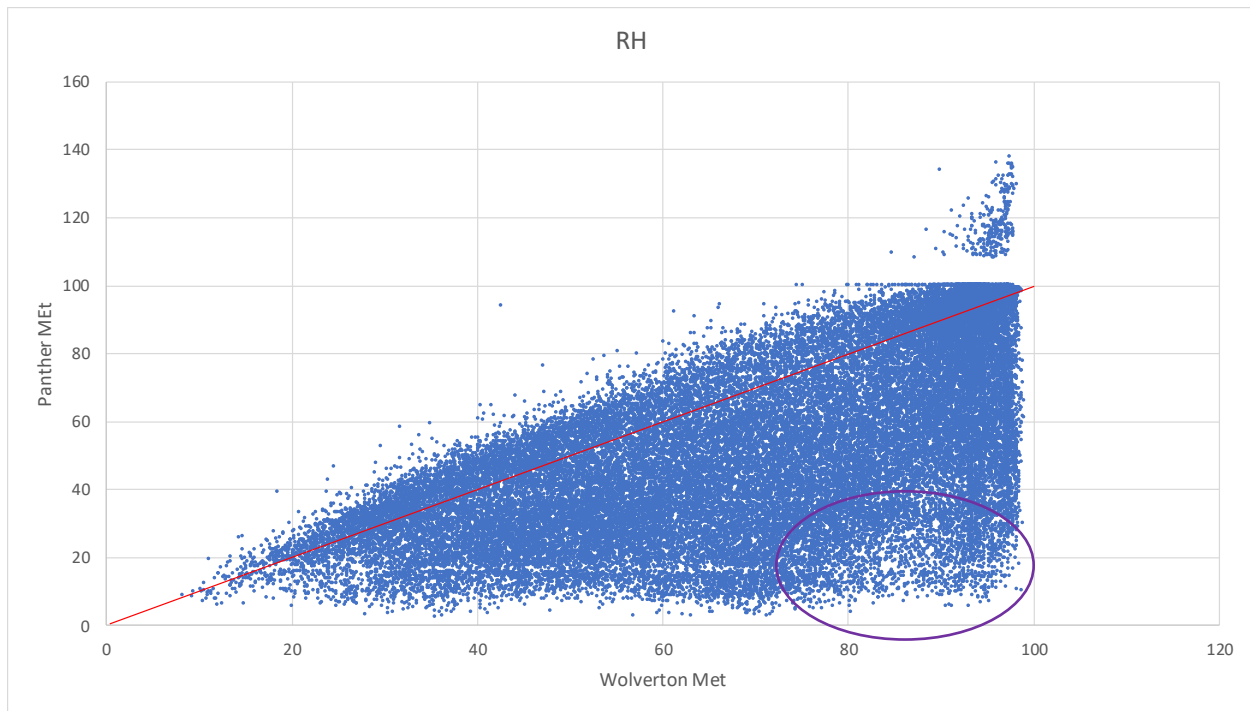

These data indicate that RH at Wolverton can be substantially higher than at Panther. Could there be any site specific issues with the Wolverton station? Are there artificial sources of moisture near the Wolverton station?

Also, note the Panther RH readings from ca. October 2011 and May 2012, where  $RH > 100\%$  which is not possible.
